# Supplementary material for: Microtip focused electrohydrodynamic jet printing with nanoscale resolution
Source: Royal Society of Chemistry journal article supplement (doi:10.1039/d0nr08236h), 2020-01-01
Supplement: d0nr08236h3.pdf [file d0nr08236h3.pdf]

Supporting Information for:

**Microtip focused electrohydrodynamic jet printing  
with nanoscale resolution**

Shijie Su <sup>a</sup>, Junsheng Liang\*<sup>a</sup>, Zizhu Wang <sup>a</sup>, Wenwen Xin <sup>a</sup>, Xiaojian Li <sup>b</sup>, Dazhi Wang<sup>b</sup>

<sup>a</sup>Key Laboratory for Micro/Nano Technology and System of Liaoning Province, Dalian

University of Technology, Dalian 116023, China

<sup>b</sup>Key Laboratory for Precision and Non-traditional Machining Technology of Ministry of

Education, Dalian University of Technology, Dalian 116023, China

To whom correspondence should be addressed: E-mail: [jsliang@dlut.edu.cn](mailto:jsliang@dlut.edu.cn)

## 1. Effects of substrate speeds on nanofiber patterns

The substrate speed has a significant effect on the physical characteristics of the deposited nanofibers. A variety of PEO nanofiber patterns were deposited as shown in Figure S1 when the substrate speed increased from 0.9 mm/s to 5.5 mm/s. The perturbation in the pattern deposited on the substrate under a lower substrate speed (e.g., 0.9 mm/s) was due to the oscillatory bending instability of jet caused by the combined effects of charge repulsive force, electric field and drag force between the substrate and the jet.<sup>1</sup> As the substrate speed increased, the coiling effects owing to buckling diminished until the substrate speed matched the nanofiber ejection speed (in this case 5 mm/s), and resulted in a straight line (Figure S1).

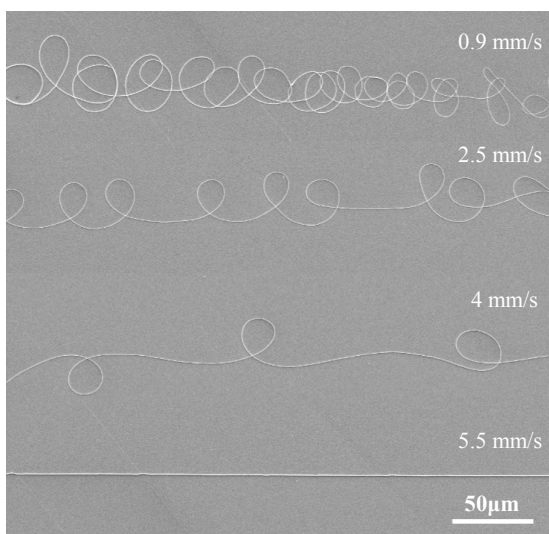

Figure S1 SEM images showing the nanofiber patterns at different substrate speeds

## References:

1. Wang, X., Zheng, G., He, G., Wei, J., Liu, H., Lin, Y., Zheng, J. and Sun, D., *MATER LETT*, 2013, **109**, 58-61.
