# Supplementary figures and images for: Microtip focused electrohydrodynamic jet printing with nanoscale resolution
Source: Royal Society of Chemistry journal article supplement (doi:10.1039/d0nr08236h), 2020-01-01

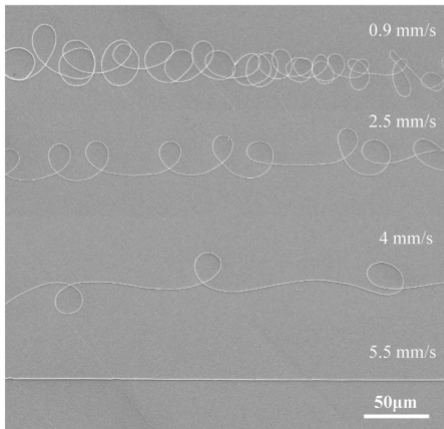

Supplement: d0nr08236h2.pdf [file d0nr08236h2.pdf]
